# Supplementary material for: Seed-Derived Microbial Colonization of Wild Emmer and Domesticated Bread Wheat (Triticum dicoccoides and T. aestivum) Seedlings Shows Pronounced Differences in Overall Diversity and Composition
Source: PubMed Central journal article supplement (PMC7683402; doi:10.1128/mbio.02637-20), 2020-11-17
Supplement: mBio.02637-20-sf005.pdf [file mBio.02637-20-sf005.pdf]

A

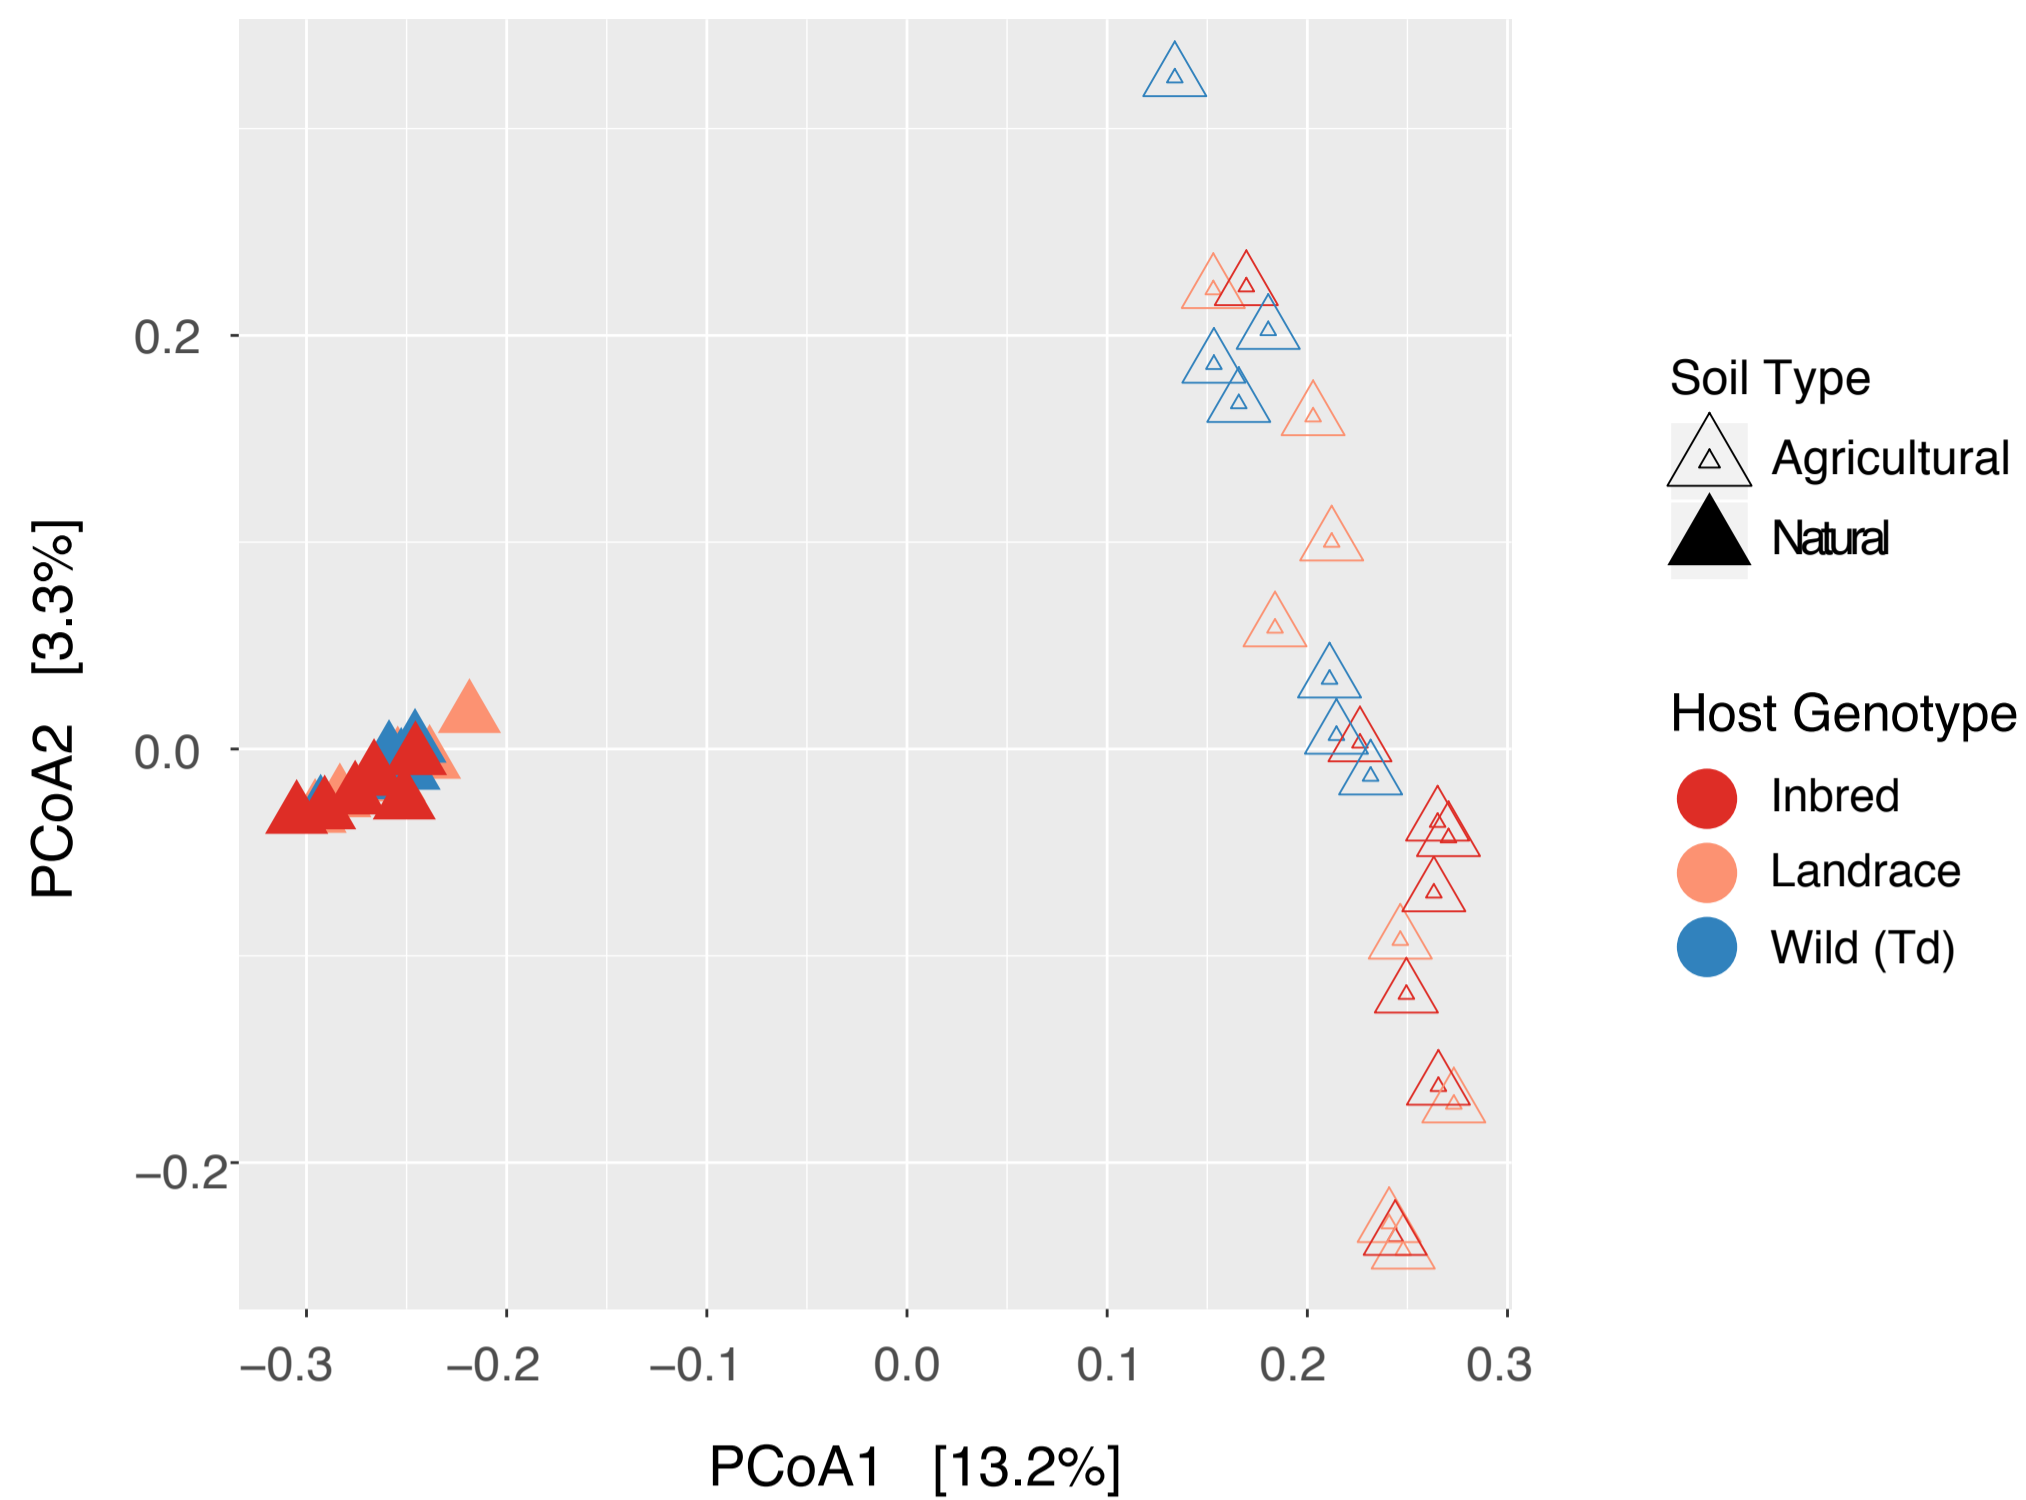

B

| ROOTS- EXPLAINED VARIATION in BETA DIVERSITY |                          |        |          |
|----------------------------------------------|--------------------------|--------|----------|
| Beta <sub>Bray</sub>                         | Soil Type                | 8.52 % | p= 0.001 |
| ROOTS- PAIRWISE BETA DIVERSITY               |                          |        |          |
| Landrace & Wild (Td)                         | p= 0.028                 |        |          |
| Inbred & Landrace                            | p= 6.5 X10 <sup>-5</sup> |        |          |
| Inbred & Wild (Td)                           | p= 0.000                 |        |          |

C

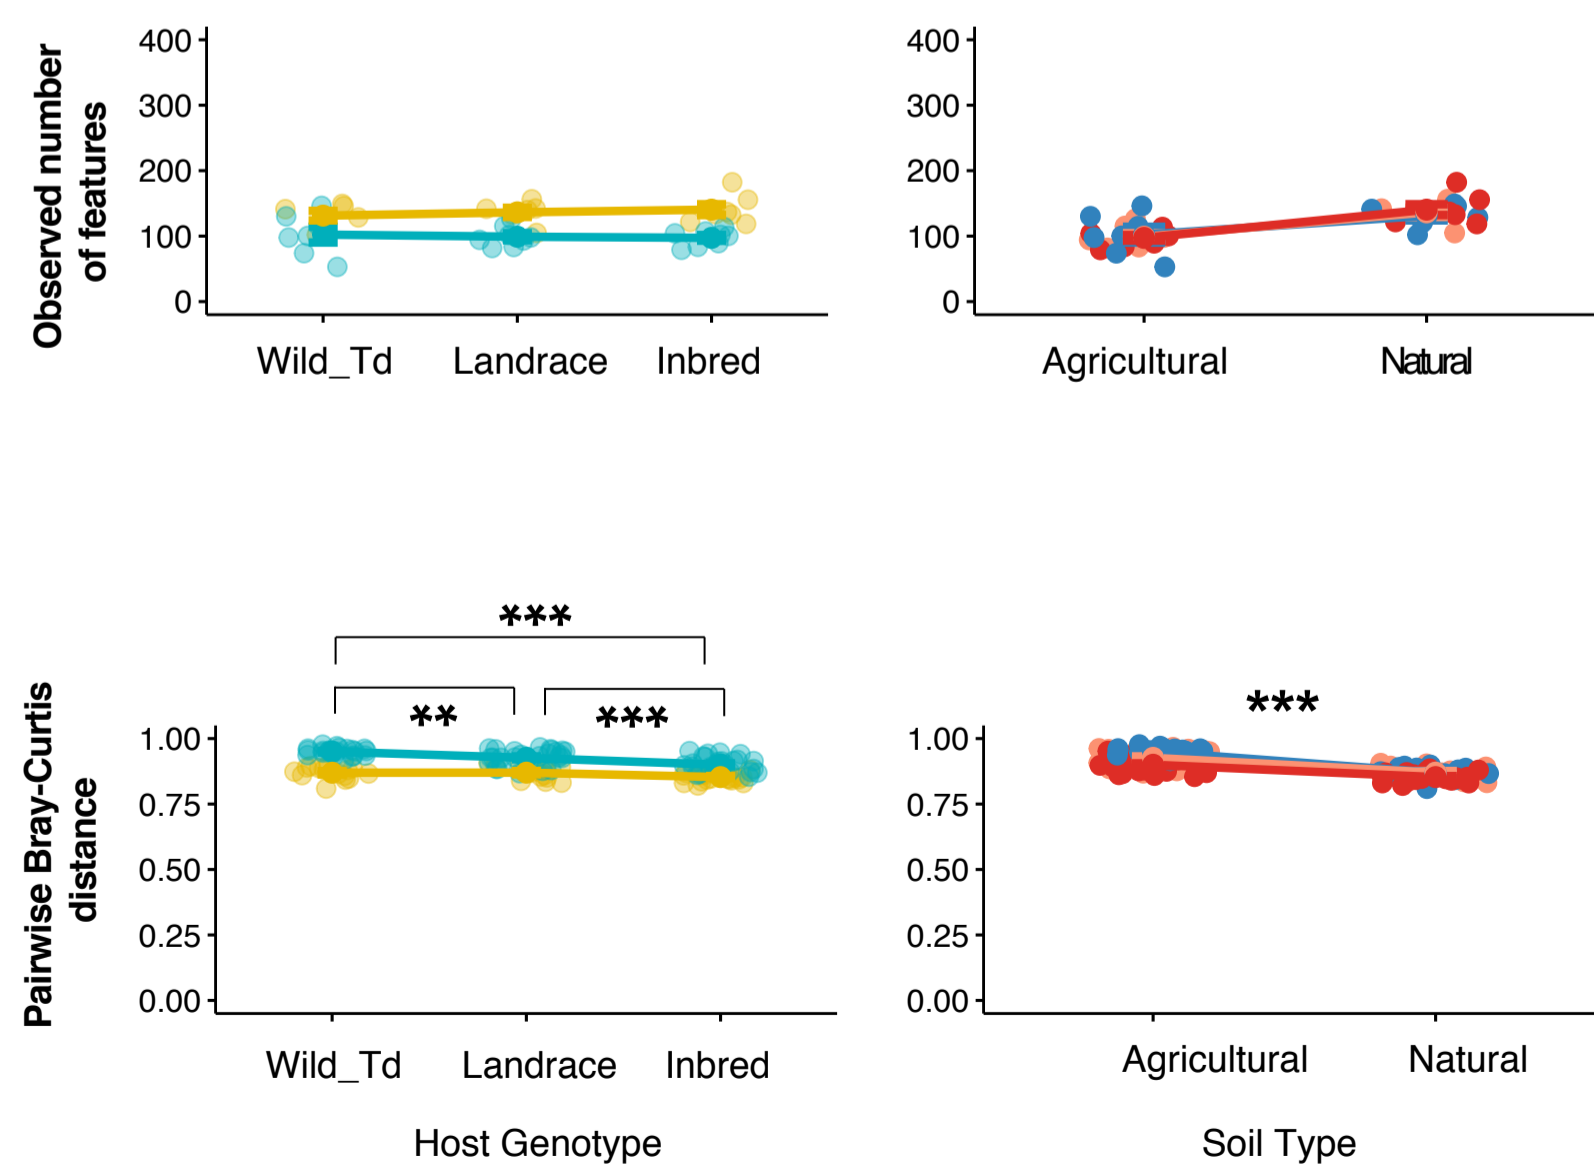

D

|                                    | Agricultural |          |        | Natural |          |        |
|------------------------------------|--------------|----------|--------|---------|----------|--------|
|                                    | Wild_Td      | Landrace | Inbred | Wild_Td | Landrace | Inbred |
| Ascomycota; Pseudeurotiaceae       | 33.4         | 28.4     | 33.9   | 0       | 0.1      | 0.1    |
| Ascomycota; Phaeosphaeriaceae      | 1.9          | 8.2      | 3.4    | 12.2    | 15.4     | 12.7   |
| Mortierellomycota; Mortierellaceae | 14.8         | 3.9      | 2.2    | 7.2     | 13.8     | 7.3    |
| Ascomycota; Onygenales (IS)        | 12.4         | 15       | 12.5   | 0       | 0.3      | 0.7    |
| Ascomycota; Helotiaceae            | 11.4         | 13.7     | 10.8   | 0.7     | 0.2      | 1.1    |
| Ascomycota; Nectriaceae            | 0.2          | 1.1      | 0.1    | 10.6    | 18.1     | 15     |
| Ascomycota; Pleosporaceae          | 0            | 0        | 0      | 10.8    | 16.6     | 14.3   |
| Basidiomycota; Entolomataceae      | 4.2          | 9.7      | 16.3   | 0       | 0        | 0      |
| Ascomycota; Lasiosphaeriaceae      | 2.9          | 0.2      | 0.2    | 12.2    | 4.8      | 8.9    |
| Basidiomycota; Psathyrellaceae     | 0            | 0        | 0      | 16.3    | 3.8      | 6.7    |
| Basidiomycota; Ceratobasidiaceae   | 0            | 0        | 0      | 10.5    | 1.5      | 11.5   |
| Ascomycota; Myxotrichaceae         | 6.4          | 3.1      | 3.5    | 0       | 0        | 0      |
| Ascomycota; Chaetomiaceae          | 0.2          | 0.1      | 0      | 7.4     | 3        | 3.1    |
| Ascomycota; Cephalothecaceae       | 2.5          | 3.8      | 3.5    | 0.1     | 0.4      | 0.2    |
| Ascomycota; Helotiales (IS)        | 2.7          | 3.4      | 2.6    | 0       | 0        | 0      |
| Ascomycota; Pyronemataceae         | 0            | 0.3      | 0.5    | 1.8     | 4.1      | 3.5    |
| Ascomycota; Diatrypaceae           | 0            | 0        | 0      | 2       | 5.1      | 2.4    |
| Basidiomycota; Stephanosporaceae   | 0            | 0        | 0      | 2.3     | 4.8      | 1.6    |
| Ascomycota; Myrmecridiaceae        | 0.9          | 3.7      | 1.5    | 0       | 0        | 0      |
| Ascomycota; Aspergillaceae         | 1.4          | 1.7      | 1.5    | 0.4     | 0.5      | 0.4    |

Soil Type ● Agricultural ● Natural Host Genotype ● Wild\_Td ● Landrace ● Inbred
