# Supplementary material for: Seed-Derived Microbial Colonization of Wild Emmer and Domesticated Bread Wheat (Triticum dicoccoides and T. aestivum) Seedlings Shows Pronounced Differences in Overall Diversity and Composition
Source: PubMed Central journal article supplement (PMC7683402; doi:10.1128/mbio.02637-20), 2020-11-17
Supplement: mBio.02637-20-sf006.pdf [file mBio.02637-20-sf006.pdf]

**A**

|                                     | Leaf    |          |        | Root    |          |        | Soil         |           |
|-------------------------------------|---------|----------|--------|---------|----------|--------|--------------|-----------|
|                                     | Wild_Td | Landrace | Inbred | Wild_Td | Landrace | Inbred | Natural soil | Agr. soil |
| Proteobacteria; Oxalobacteraceae    | 22.2    | 12.2     | 21.1   | 18.6    | 26.5     | 24.4   | 1            | 0.9       |
| Actinobacteria; Streptomyetaceae    | 0.3     | 2        | 3      | 32.6    | 27       | 30     | 0.7          | 10.3      |
| Proteobacteria; Comamonadaceae      | 7.4     | 19.9     | 16.1   | 8.3     | 9.8      | 8.8    | 2            | 3.5       |
| Proteobacteria; Rhizobiaceae        | 21.3    | 12.8     | 12.1   | 1       | 1.3      | 1.1    | 0.2          | 0         |
| Proteobacteria; Halomonadaceae      | 13.6    | 15.9     | 15.7   | 0       | 0.1      | 0      | 0            | 0         |
| Proteobacteria; Vibrionaceae        | 14.7    | 14       | 8.4    | 0       | 0.1      | 0      | 0            | 0         |
| Actinobacteria; Micromonosporaceae  | 0.1     | 0.5      | 0.6    | 5.6     | 5.9      | 7.7    | 3.4          | 1.9       |
| Actinobacteria; Nocardiodaceae      | 0.3     | 0.9      | 1.5    | 5.1     | 4.2      | 4      | 4            | 5.4       |
| Bacteroidetes; Flavobacteriaceae    | 0.2     | 0.4      | 0.2    | 5.9     | 4.6      | 4.7    | 0.3          | 2.1       |
| Proteobacteria; Xanthomonadaceae    | 1.3     | 1.6      | 1.3    | 3       | 2.7      | 2.7    | 1.5          | 5.9       |
| Proteobacteria; Burkholderiaceae    | 3.5     | 2        | 3.2    | 0.4     | 0.5      | 0.3    | 0.1          | 2.1       |
| Proteobacteria; Phyllobacteriaceae  | 3.5     | 1.6      | 3.1    | 0.3     | 0.3      | 0.4    | 0.2          | 0.5       |
| Proteobacteria; Pseudomonadaceae    | 2.7     | 1.7      | 1.6    | 0.6     | 0.6      | 0.5    | 0.2          | 0.9       |
| Actinobacteria; Geodermatophilaceae | 0       | 0.2      | 0.2    | 0.5     | 0.5      | 0.4    | 21.8         | 0.2       |
| Proteobacteria; Hyphomicrobiaceae   | 0.2     | 0.4      | 0.3    | 1.4     | 1.4      | 1.4    | 0.7          | 6.9       |
| Actinobacteria; Actinosynnemataceae | 0       | 0.1      | 0.1    | 2.5     | 1.8      | 1.9    | 1.6          | 0.4       |
| Proteobacteria; Caulobacteraceae    | 0.1     | 0.2      | 0.2    | 1.7     | 1.6      | 1.4    | 1            | 1.6       |
| Actinobacteria; Rubrobacteraceae    | 0       | 0.2      | 0.1    | 0.3     | 0.2      | 0.2    | 12.9         | 0.1       |
| Actinobacteria; Microbacteriaceae   | 0.1     | 0.2      | 0.3    | 1       | 0.8      | 0.9    | 1.4          | 1.5       |
| Proteobacteria; [Chromatiaceae]     | 1.4     | 1.5      | 0.6    | 0       | 0.1      | 0      | 0            | 0         |

**B**

|                                      | Agricultural |          |        | Natural |          |        |
|--------------------------------------|--------------|----------|--------|---------|----------|--------|
|                                      | Wild_Td      | Landrace | Inbred | Wild_Td | Landrace | Inbred |
| Proteobacteria; Oxalobacteraceae     | 44.1         | 20.3     | 36.2   | 0.3     | 1.3      | 1      |
| Proteobacteria; Rhizobiaceae         | 0.1          | 0.1      | 0      | 42.5    | 29.6     | 28.2   |
| Proteobacteria; Halomonadaceae       | 11.2         | 10.5     | 8.1    | 16.1    | 23.2     | 25.8   |
| Proteobacteria; Comamonadaceae       | 10.4         | 21.3     | 17.1   | 4.4     | 18.1     | 14.8   |
| Proteobacteria; Vibrionaceae         | 8.1          | 16.3     | 4.5    | 21.2    | 11       | 13.6   |
| Proteobacteria; Burkholderiaceae     | 7            | 2.9      | 5.6    | 0       | 0.7      | 0.1    |
| Proteobacteria; Phyllobacteriaceae   | 0.1          | 0.1      | 0.2    | 7       | 3.7      | 6.9    |
| Proteobacteria; Pseudomonadaceae     | 4.4          | 2.6      | 2.4    | 1.1     | 0.4      | 0.4    |
| Actinobacteria; Streptomyetaceae     | 0.5          | 3.1      | 5.1    | 0       | 0.6      | 0.1    |
| Proteobacteria; Xanthomonadaceae     | 1.5          | 2.2      | 1.9    | 1       | 0.8      | 0.6    |
| Proteobacteria; [Chromatiaceae]      | 0.6          | 2.1      | 0.2    | 2.3     | 0.8      | 1.3    |
| Proteobacteria; Neisseriaceae        | 1.5          | 1.7      | 1.8    | 0.7     | 0.5      | 0.7    |
| Actinobacteria; Nocardiodaceae       | 0.5          | 1.2      | 2.4    | 0       | 0.6      | 0.3    |
| Actinobacteria; Propionibacteriaceae | 0.8          | 2.1      | 0.8    | 0.1     | 0.3      | 0.3    |
| Firmicutes; Streptococcaceae         | 0.8          | 1.1      | 0.7    | 0.6     | 0.3      | 0.5    |
| Proteobacteria; Enterobacteriaceae   | 0.5          | 1.1      | 0.5    | 0.7     | 0.4      | 0.5    |
| Proteobacteria; Methylobacteriaceae  | 0.5          | 0.9      | 0.5    | 0.1     | 0.7      | 0.5    |
| Actinobacteria; Micromonosporaceae   | 0.1          | 0.5      | 1      | 0.1     | 0.5      | 0.1    |
| Firmicutes; Staphylococcaceae        | 0.3          | 0.7      | 0.7    | 0       | 0.2      | 0.2    |
| Proteobacteria; Methylophilaceae     | 0.2          | 0.5      | 0.6    | 0.1     | 0.4      | 0.2    |

**C**

|                                       | Agricultural |          |        | Natural |          |        |
|---------------------------------------|--------------|----------|--------|---------|----------|--------|
|                                       | Wild_Td      | Landrace | Inbred | Wild_Td | Landrace | Inbred |
| Actinobacteria; Streptomyetaceae      | 49.7         | 40.2     | 46.2   | 15.5    | 11.5     | 8.5    |
| Proteobacteria; Oxalobacteraceae      | 11.6         | 22       | 23.3   | 25.7    | 31.8     | 25.9   |
| Proteobacteria; Comamonadaceae        | 2.7          | 5.2      | 3.3    | 14      | 15       | 16.1   |
| Actinobacteria; Micromonosporaceae    | 3.6          | 3.5      | 3.3    | 7.6     | 8.8      | 13.6   |
| Bacteroidetes; Flavobacteriaceae      | 0.5          | 0.5      | 0.3    | 11.2    | 9.4      | 10.5   |
| Actinobacteria; Nocardiodaceae        | 8            | 6.2      | 5.4    | 2.2     | 1.8      | 2.1    |
| Proteobacteria; Xanthomonadaceae      | 4.1          | 3.6      | 3.1    | 2       | 1.6      | 2.2    |
| Actinobacteria; Actinosynnemataceae   | 1.4          | 0.9      | 0.5    | 3.7     | 2.9      | 3.9    |
| Proteobacteria; Caulobacteraceae      | 1.7          | 1.5      | 1      | 1.7     | 1.7      | 1.8    |
| Proteobacteria; Hyphomicrobiaceae     | 2            | 2        | 1.7    | 0.7     | 0.7      | 0.9    |
| Proteobacteria; Rhizobiaceae          | 0.6          | 1.2      | 0.8    | 1.5     | 1.4      | 1.5    |
| Actinobacteria; Thermomonosporaceae   | 1            | 1.2      | 1.1    | 1.1     | 1.3      | 0.8    |
| Actinobacteria; Microbacteriaceae     | 1            | 0.8      | 0.7    | 0.9     | 0.8      | 1.2    |
| Actinobacteria; Promicromonosporaceae | 0.4          | 0.5      | 0.3    | 1.7     | 0.9      | 1.4    |
| Chloroflexi; [Kouleothrixaceae]       | 0.4          | 0.4      | 0.4    | 0.7     | 1.4      | 1.1    |
| Actinobacteria; Pseudonocardiaceae    | 0.3          | 0.4      | 0.1    | 1.1     | 1.1      | 0.9    |
| Proteobacteria; Pseudomonadaceae      | 0.5          | 0.4      | 0.2    | 0.8     | 0.9      | 0.8    |
| Firmicutes; Paenibacillaceae          | 0.8          | 1.3      | 0.8    | 0       | 0        | 0      |
| Proteobacteria; Bradyrhizobiaceae     | 0.8          | 0.7      | 0.5    | 0.3     | 0.4      | 0.4    |
| Actinobacteria; Micrococcaceae        | 0.5          | 0.2      | 0.5    | 1       | 0.5      | 0.4    |

high  
|  
low
